# Supplementary material for: Crystal structures of an ICAM-5 ectodomain fragment show electrostatic-based homophilic adhesions
Source: PubMed Central journal article supplement (PMC4089487; doi:10.1107/s1399004714009468), 2014-06-29
Supplement: d-70-01934-sup1.pdf [file d-70-01934-sup1.pdf]

**Supplementary Table 1. Interactions between the N- (D1-D2) and C- (D3-D4) terminal modules of the IC5-4D molecule in the crystals.**

Interface A: P<sub>4</sub>22 (840 Å<sup>2</sup>)

|           |         |         |           |
|-----------|---------|---------|-----------|
| <b>D1</b> | Arg 33  | Asp 221 | <b>D3</b> |
|           | Glu 37  | Arg 201 |           |
| <b>D2</b> | Arg 74  | Asp 249 | <b>D4</b> |
|           | Arg 112 | Asp 353 |           |
|           | Arg 119 | Asp 357 |           |
|           | Arg 144 | Thr 362 |           |
|           | Arg 146 | Thr 362 |           |

Interface B: P<sub>2</sub><sub>1</sub> (570 Å<sup>2</sup>), R<sub>3</sub> (470 Å<sup>2</sup>)

|           |        |         |           |
|-----------|--------|---------|-----------|
| <b>D1</b> | Glu 32 | Ser 349 | <b>D4</b> |
|           | Arg 33 | Asp 345 |           |
|           | Leu 36 | Asn344  |           |
|           | Arg 42 | Asn 344 |           |
|           | Thr 45 | Glu 343 |           |
|           | Arg 47 | Glu 343 |           |
|           | Gly48  | Tyr375  |           |
|           | Arg 54 | Arg347  |           |
|           | Arg 71 | Glu 343 |           |
|           |        | Asn 344 |           |
|           |        | Glu 324 |           |

Interface C: P<sub>2</sub><sub>1</sub> (600 Å<sup>2</sup>)

|           |          |         |                        |
|-----------|----------|---------|------------------------|
| <b>D1</b> | Arg 75   | Asp 357 | <b>D4</b>              |
| <b>D2</b> | Arg 119  | Asp 198 | <b>D3</b>              |
|           | Arg 144  | Glu 284 |                        |
| <b>D3</b> | NAG 2851 | Ser 39  | <b>D1</b><br><b>D2</b> |
|           |          | Glu 61  |                        |
|           |          | Glu 63  |                        |
|           |          | Thr64   |                        |
|           |          | Gln 65  |                        |
|           |          | Arg 80  |                        |
|           |          | Arg 144 |                        |
|           | NAG 2852 | Ser39   | <b>D1</b>              |
|           |          | Glu61   |                        |
|           |          | Glu63   |                        |
|           |          | Thr64   |                        |
|           | BMA 2853 | Ser 39  | <b>D1</b>              |
|           |          | Leu 40  |                        |
|           |          | Arg 41  |                        |
|           | MAN 2854 | Leu 40  | <b>D1</b>              |
|           |          | Arg 41  |                        |
|           |          | Val 57  |                        |
|           |          | Asp 58  |                        |
|           |          | Arg 60  |                        |
|           |          | Glu 61  |                        |

Interface D: P<sub>2</sub><sub>1</sub> (500 Å<sup>2</sup>)

|           |        |         |           |
|-----------|--------|---------|-----------|
| <b>D1</b> | Glu 15 | Arg 372 | <b>D4</b> |
|           | Ser 19 | Tyr 375 |           |
| <b>D2</b> | Arg 88 | Ser 304 |           |
|           | Asp 90 | Asp 346 |           |
|           |        | Val 373 |           |
|           |        | Arg 372 |           |

Intermolecular interfaces A to D in the IC5-4D crystals, with buried surface areas (parenthesis) over 500 Å<sup>2</sup> in each interacting molecule. Residues involved in polar interactions (salt bridges and hydrogen bonds) between IC5-4D molecules, computed with PISA. Residues in the N-terminal D1-D2 module and the interacting residues in the C-terminal D3-D4 module are on the same file of the table. Basic and acid residues are in blue and red, respectively. Interacting molecules are shown in Supplementary Figure 3.

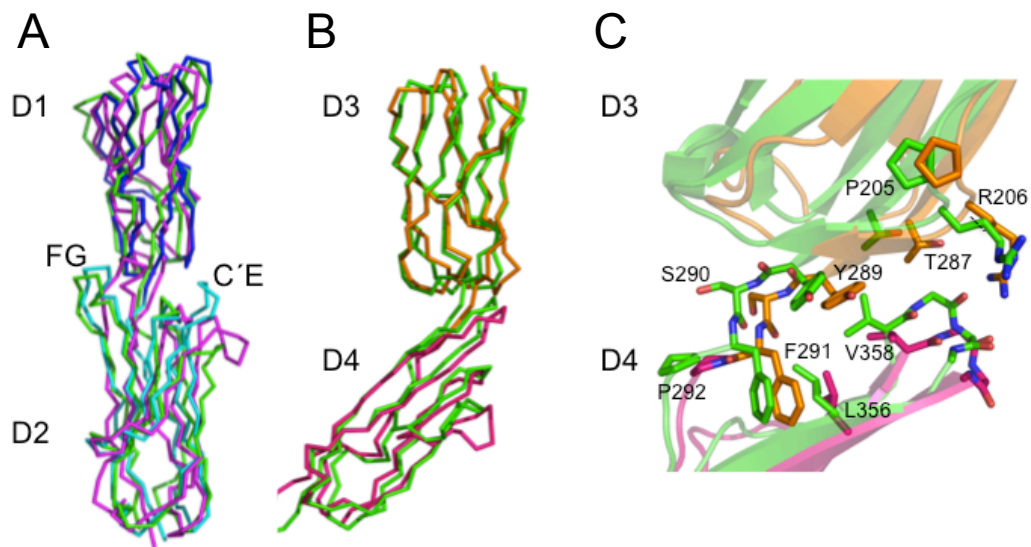

**Supplementary Figure 1.** Two-domain modules in the ICAM subfamily. (A) Superposition of the D1-D2 modules of ICAM-5 (D1 blue and D2 cyan), ICAM-1 (green) and ICAM-2 (magenta). (B) Superposition of the D3-D4 modules of ICAM-5 (D3 orange and D4 red) and ICAM-1 (green). (C) View of the D3-D4 interdomain region in ICAM-5 and ICAM-1, with conserved residues shown in stick. ICAM-5 residues labeled.

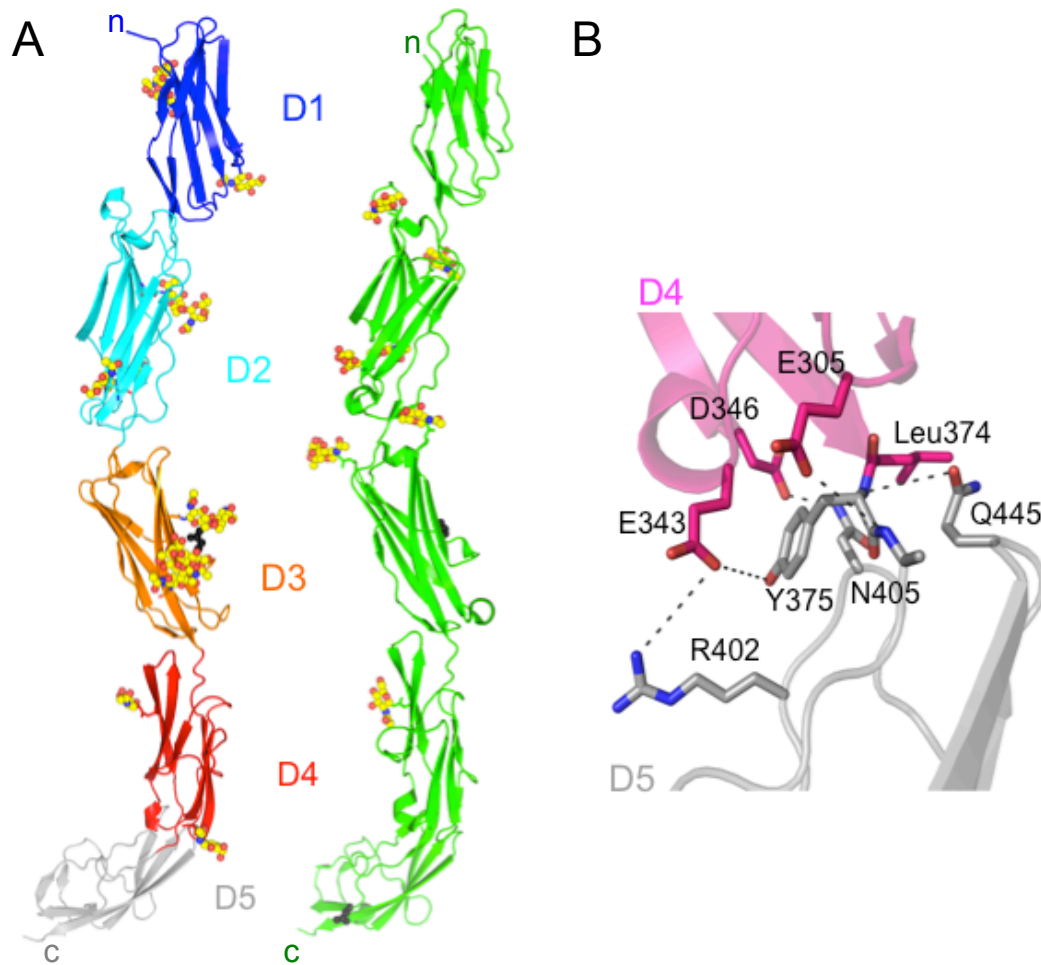

**Supplementary Figure 2.** Structural models of the N-terminal five domain fragments of ICAM-5 and ICAM-1. Ribbon diagrams of models prepared as described in Methods. (A) The IC5-5D fragment is shown on the left with D1-D4 fragment structure represented in Figure 1, and the modeled D5 in grey. The ICAM-1 structure is green. Side chains of asparagines with N-linked glycosylations are shown in sticks, and the N-linked carbohydrates in the structures as spheres with carbon in yellow, nitrogen, blue and oxygen, red. Asparagine residues without any modeled carbohydrate in the structures (Asn239 in ICAM-5; Asn233 and Asn379 in ICAM-1) are shown in black. (B) View of the modeled D4-D5 interdomain region of ICAM-5, with conserved residues in ICAM-1 shown in stick.

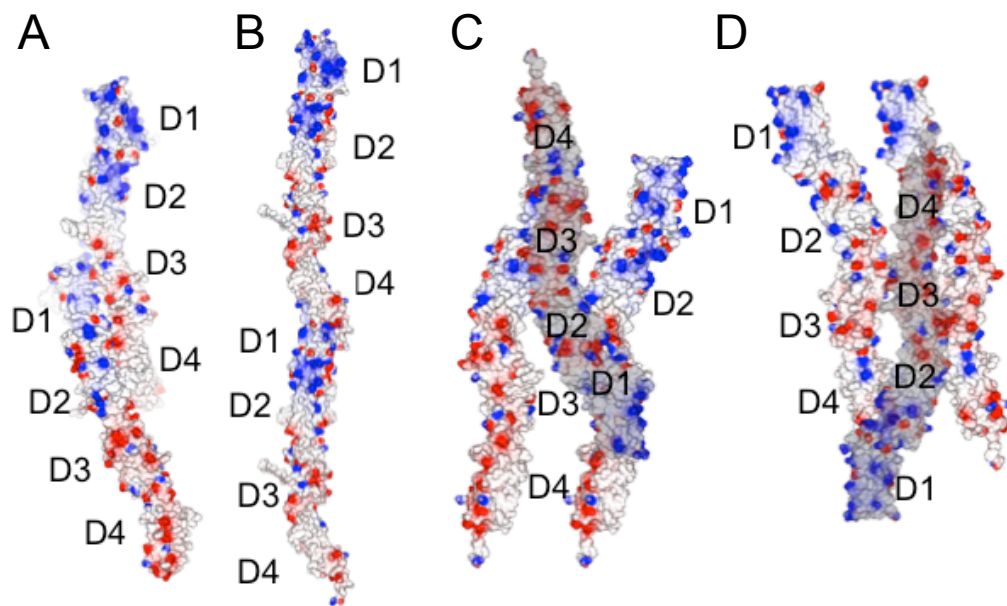

**Supplementary Figure 3. Interactions between the N and C-terminal portions of IC5-4D molecules in the crystals.** Surface representation of interacting IC5-4D molecules showed with their electrostatic surface potential. Homodimers with the highest buried surface area ( $BSA \geq 500 \text{ \AA}^2$ ) in the IC5-4D crystal structures are shown. Intermolecular interaction in the  $P4_322$  (interface A) and  $P2_1$  (interface B) crystal structures are shown in (A) and (B), respectively, where molecules follow head-tail parallel packing. Homodimers shown in (B) are similar to crystal contacts found in the R3 crystal structure. Two distinct antiparallel arrangements of the IC5-4D molecules in the  $P2_1$  crystal structure, interfaces C and D, are shown in (C) and (D), respectively. The head (D1-D2) and tail (D3-D4) of one IC5-4D molecule (shaded) contacts two symmetry-related molecules, so that  $\sim 1000 \text{ \AA}^2$  of its accessible surface is buried. Buried surface areas and residues in the interfaces are included in Supplementary Table 1. Details of the interfaces A to C are shown in Figure 5.
